# Supplementary material for: Fabrication of chemically stable hydrogen- and niobium-codoped ZnO transparent conductive films
Source: Royal Society of Chemistry journal article supplement (doi:10.1039/c9ra01231a), 2019-01-01
Supplement: c9ra01231a1.pdf [file c9ra01231a1.pdf]

## Electronic Supplementary Information

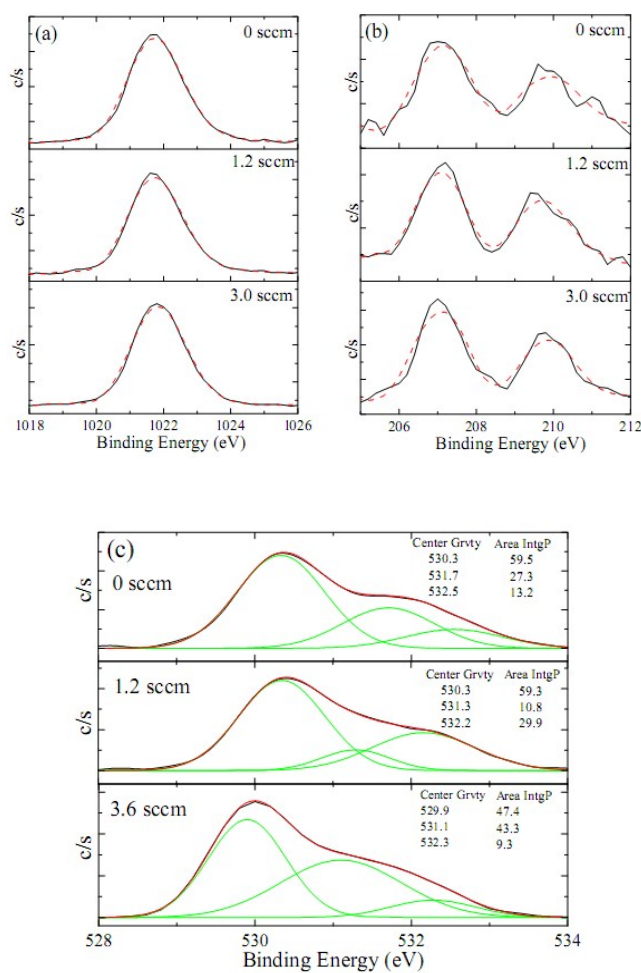

**Fig. 4.** The typical XPS spectra of (a) Zn 2p, (b) Nb 3d, and (c) O 1s of the NZO films with and without H doping.
